# Supplementary material for: Tumor-Extrinsic Axl Expression Shapes an Inflammatory Microenvironment Independent of Tumor Cell Promoting Axl Signaling in Hepatocellular Carcinoma
Source: MDPI journal article supplement (doi:10.3390/ijms25084202), 2024-04-10
Supplement: s1 [file s1]

## *Supplementary Material and Methods*

### **1.1. Sample preparation for mass spectrometry analysis**

Cell pellets were resuspended in lysis buffer (8 M urea (VWR, 0568-500G), 50 mM Tris-HCl pH8.0, 150 mM NaCl, 1 mM PMSF, 5 mM sodium butyrate (Sigma-Aldrich, 303410), 10 ng/ml NAM (Sigma Aldrich, 72340), 10 ng/ml trichostatin A (TSA) (Sigma Aldrich, T8552-1MG), 1x cOmplete protease inhibitor cocktail (+EDTA) (Roche, 11697498001), 250 U/replicate benzonase (Merck, 1.01695.0001) and lysed using a Bioruptor sonication device (Diagenode) (settings: 30 sec sonication (power level H, 30 sec cooling, 5 cycles). Lysates were centrifuged at 15,000 x g for 10 min at 4°C and precipitated with 4x volumes of cold (-20°C) 100% acetone overnight at 4°C.

Protein pellets were washed with cold (-20°C) 80% acetone, air dried for 5 min, dissolved in 8 M urea, 50 mM ABC (Sigma Aldrich, 09830-500G), reduced with 10 mM DTT (Roche, 10197777001) for 45 min at room temperature, and subsequently carbamidomethylated with 20 mM IAA (Sigma Aldrich, I6125-5G) for 30 min at room temperature in the dark. The alkylation reaction was quenched by adding 5 mM DTT for 10 min. The urea concentration was reduced to 4 M using 50 mM ABC. Samples were pre-digested for 90 min at 37°C with Lys-C (FUJIFILM Wako Pure Chemical Corporation, 125-02543) at an enzyme-to-substrate ratio of 1:100 and subsequently reduced to 1 M Urea using 50 mM ABC and digested overnight at 37°C with sequencing grade trypsin (Trypsin Gold, Mass Spec Grade, Promega, V5280) at an enzyme-to-substrate ratio of 1:50. Digests were stopped by acidification with TFA (Thermo Scientific, 28903; 0.5% final concentration) and desalted on a 50 mg tC18 Sep-Pak cartridge (Waters, WAT054960). Peptide concentrations were determined and adjusted according to UV chromatogram peaks obtained with an UltiMate 3000 Dual LC nano-HPLC System (Dionex, Thermo Fisher Scientific; Waltham; USA), equipped with a monolithic C18 column (Phenomenex; Torrance; USA). Desalted samples were concentrated in a SpeedVac concentrator (Eppendorf; Hamburg; Germany) and subsequently lyophilized overnight.

Lyophilized peptides were dissolved in 50 µl 100 mM TEAB (Sigma; St. Louis; USA). 450 µg of each TMT pro reagent (Thermo Fisher Scientific; Waltham; USA) were dissolved in 30 µl of 100% anhydrous acetonitrile and 30 µl was added to the 20µl/300µg peptide/TEAB mixes. Labels used: 126C: MR 1; 127C: MR 2; 127N: MR-Axl 1; 128N: MR-Axl 2; 129C: MR 3; 129N: MR-Axl 3; 130C: MR 1+Gas6; 130N: MR-Axl 1+Gas6; 131C MR-Axl 2+Gas6; 131N: MR-Axl +Gas6; 132C: MR3+Gas6; 132N: MR-Axl 3+Gas6. Samples were labeled for 60 min at room temperature. 0.1 µl of each sample were pooled, mixed with 10 µl 0.1% TFA, and analyzed by mass spectrometry (MS) to check labeling efficiency. For quenching, 8 µl of 5% hydroxylamine was added and the reaction was incubated for 25 min at room temperature. Samples were pooled and subsequently desalted with Sep-Pak tC-18 cartridges (Waters). Desalted samples were dried for 30 min in a SpeedVac vacuum centrifuge and subsequently lyophilized overnight.

10% TFA was used to adjust the pH of the mix to less than 7 before neutral pH fractionation was performed using a 60 min gradient of 4.5 to 45% ACN (VWR, 83639.320) in 10 mM ammonium formate (1 ml formic acid, Merck, 1.11670.1000), 3ml ammonia (13N) (1.05432.1000) in 300 ml H<sub>2</sub>O, pH = 7 - 8, dilute 1:10) on an UltiMate 3000 Dual LC nano-HPLC System (Dionex, Thermo Fisher Scientific; Waltham; USA) equipped with a XBridge Peptide BEH C18 (130 Å, 3.5 µm, 4.6 mm x 250 mm) column (Waters) (flow rate of 1.0 ml / min). Fractions were collected and subsequently pooled in a non-contiguous manner into 8 pools, and lyophilized overnight.

Phosphorylated peptides were enriched using TiO<sub>2</sub>. An aliquot (peptide: TiO<sub>2</sub> resin = 1:6) of TiO<sub>2</sub> (Titansphere TiO, GL Sciences, 5020-75000) was washed twice with 50% methanol (Fisher chemical, A456-212) and twice with glycolic acid solution (1 M glycolic acid (Sigma Aldrich, 124737-25G), 70% ACN (VWR, 83639.320), 3% TFA (Thermo Scientific, 28903; Waltham; USA). Lyophilized peptides were dissolved in glycolic acid solution, mixed with the TiO<sub>2</sub> resin, and incubated rotating at room temperature for 30 min. Samples were loaded onto Mobicol columns (MoBiTec, M1003, M2110) and shortly centrifuged in a table centrifuge to remove unphosphorylated peptides. Phosphorylated peptides will bind to the TiO<sub>2</sub> resin. The resin was washed twice with glycolic acid solution, twice with 200 µl 70%, ACN 3%, TFA and twice with 1% ACN, 0.1% TFA. Phosphorylated peptides were eluted twice using 150 µl 300 mM ammonium hydroxide (VWR, 1.05432.1000). Eluates were united and immediately acidified with conc. TFA to a pH of 2.5. Samples were desalted using a standard C18 (Empore, 2215-C18) StageTip protocol, dried using a SpeedVac (Eppendorf; Hamburg; Germany) and dissolved in 20 ml 2% ACN, 0.1% TFA.

### **1.2. Liquid chromatography mass spectrometry analysis**

The analysis was performed on an UltiMate 3000 Dual LC nano-HPLC System (Dionex, Thermo Fisher Scientific), containing both a trapping column for peptide concentration (PepMap C18, 5x 0.3 mm, 5 µm particle size) and an analytical column (PepMap C18, 500 x 0.075 µm, 2 µm particle size, Thermo Fisher Scientific), coupled to an Orbitrap Exploris 480 mass spectrometer (Thermo Fisher) via a FAIMS Pro ion source (Thermo Fisher). The instruments were operated in data-dependent acquisition (DDA) mode with dynamic exclusion enabled. For peptide separation on the HPLC, the concentration of organic solvent (acetonitrile, VWR, 83639.320) was increased from 2% to 40% in 0.1% formic acid at a flow rate of 230

nl/min, using a 3 hrs gradient time for proteome analysis. Peptides were ionized with a spray voltage of 2,4 kV. MS1 survey scans were recorded with the following parameters: resolution 60,000, scan range 350-1,500 m/z, automatic gain control (AGC) target = Custom, and maximum injection time (IT) mode = Auto, FAIMS voltages on, FAIMS CV -40V, -55V and -70V, dynamic exclusion was set to 45 sec. MS2 analysis was performed with the following parameters: resolution 30,000, normalized AGC Target 150%, AGC target = Custom, maximum IT mode = Custom, isolation window 0.7 m/z, and HCD normalized collision energy of 34%. Total cycle time for each CV was set to 2 sec.
