# Supplementary material for: Tumor-Extrinsic Axl Expression Shapes an Inflammatory Microenvironment Independent of Tumor Cell Promoting Axl Signaling in Hepatocellular Carcinoma
Source: MDPI journal article supplement (doi:10.3390/ijms25084202), 2024-04-10
Supplement: s1 [file s1]

## Supplementary Table

Table S1: Quantitative PCR primers.

| Target                  | Sequence forward (5'-3') | Sequence reverse (5'-3')   |
|-------------------------|--------------------------|----------------------------|
| human 28S               | CAGTTCTCTTGGGAATCCAG     | TTCAGCAAAGGAGTCAATCCAC     |
| human <i>CDH1</i>       | ACCACCTCCACAGCCACCGT     | GCCACGCCAAAGTCCTCGG        |
| human <i>VIMENTIN</i>   | ATTCCACTTTGCGTTCAAGG     | CTTCAGAGAGAGGAAGCCGA       |
| human <i>SNAI1</i>      | GTAATGGCTGTCAC TTGTCG    | TGTAAACATCTTCCTCCAGG       |
| human <i>SNAI2</i>      | TGACCTGTCTGCAAATGCTC     | CAGACCCTGGTTGCTTCAA        |
| human <i>CDH2</i>       | CCACCTTAAAATCTGCAGGC     | GTGCATGAAGGACAGCCTCT       |
| mouse 28S               | ATACCGGCACGAGACCGATAGTCA | GCGGACCCACCCGTTTACCTC      |
| mouse <i>Cdh1</i>       | CAGGTCTCCTCATGGCTTTGC    | CAGGTCTCCTCATGGCTTTGC      |
| mouse <i>Vimentin</i>   | CGGCTGCGAGAGAAAATTGC     | CCACTTTTCCGTTCAAGGTCAAG    |
| mouse <i>Snai1</i>      | CACACGCTGCCTTGTGTCT      | GGTCAGCAAAGCACGGTT         |
| mouse <i>Snai2</i>      | GCGAACTGGACACACACAGTTAT  | GCTGCCGACGATGTCCATACAGTAAT |
| mouse <i>Pd-l1</i>      | AACGCCACAGCGAATGATGT     | ACAGGATGGATCCCAGAAGC       |
| mouse <i>Ccl9</i>       | CCCTCTCCTTCCTCATTCTTACA  | AGTCTTGAAAGCCCATGTGAAA     |
| mouse <i>Cxcl2</i>      | CCAACCACCAGGCTACAG       | GCGTCACACTCAAGCTCTG        |
| mouse <i>Ccl2</i>       | AAGCCAGCTCTCTCTTCCTCCA   | GCGTTAACTGCATCTGGCTGA      |
| mouse <i>Cxcl4</i>      | GTTCCCCAGCTCATAGCCACC    | TTATATAGGGGTGCTTGCCGGT     |
| mouse <i>P-Selectin</i> | CCTCCCGAATGTCAAGCTGT     | TCATCGCACATGAACTGGCA       |
| mouse <i>Vegfa</i>      | GGACGTCTACCAGCGAAGCT     | CACAGGACGGCTTGAAGATGT      |
| mouse <i>Cxcl5</i>      | TGCCCTACGGTGGAAGTCAT     | AGCTTTCTTTTGTCACTGCCC      |
| mouse <i>Vcam1</i>      | TCTTGGGAGCCTCAACGGTA     | CAAGTGAGGGCCATGGAGTC       |
